# Supplementary material for: The loss of hemoglobin and myoglobin does not minimize oxidative stress in Antarctic icefishes
Source: Oxford University Press journal article supplement (doi:10.1242/jeb.162503), 2017-01-01
Supplement: jeb162503supp.pdf [file jeb162503supp.pdf]

## HEART VENTRICLE

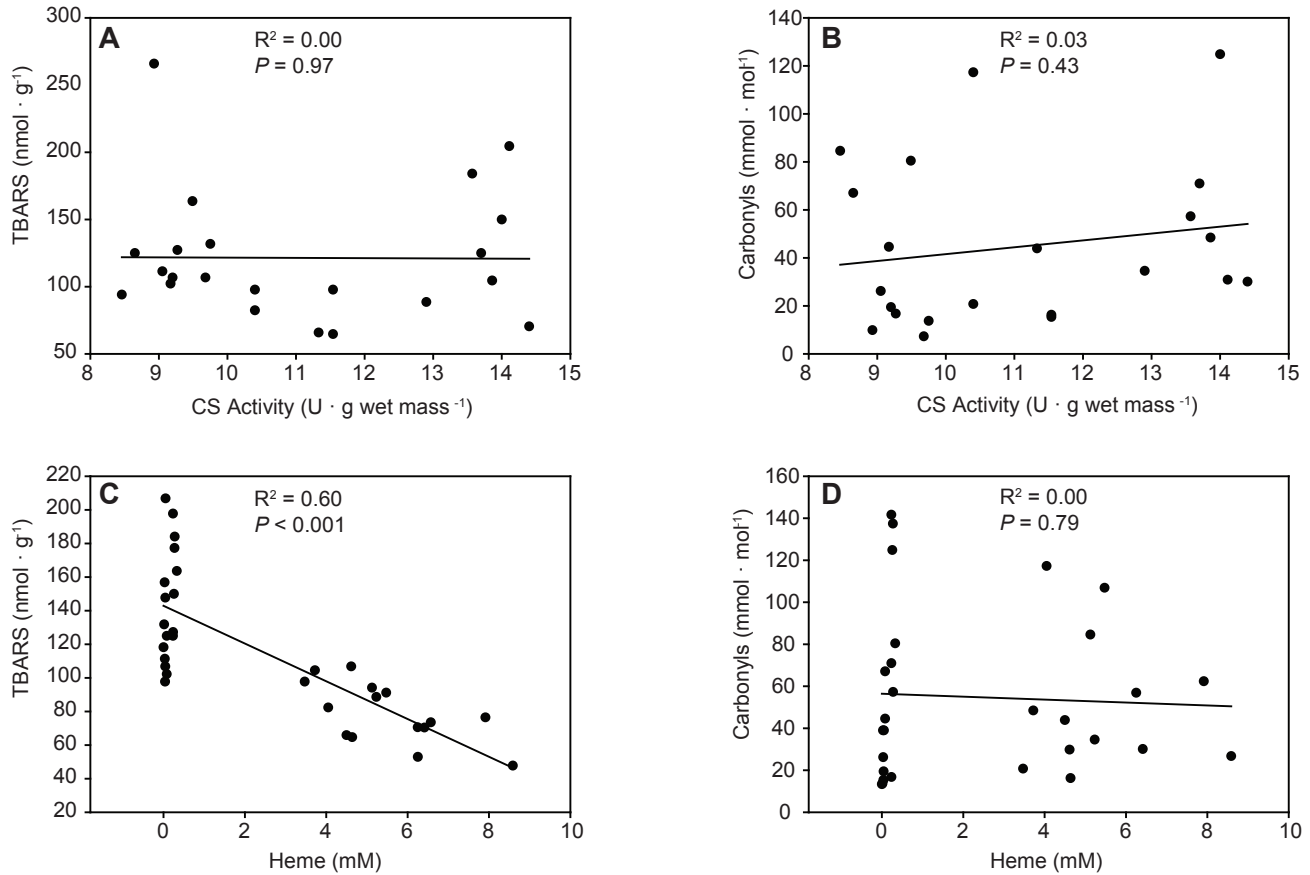

**Fig. S1.** Linear regression of pro-oxidants and levels of oxidized lipids (TBARS; 1A,C) and proteins (carbonyls; 1B,D) in heart ventricles of 5 species of notothenioids. n=22-32.

### PECTORAL ADDUCTOR

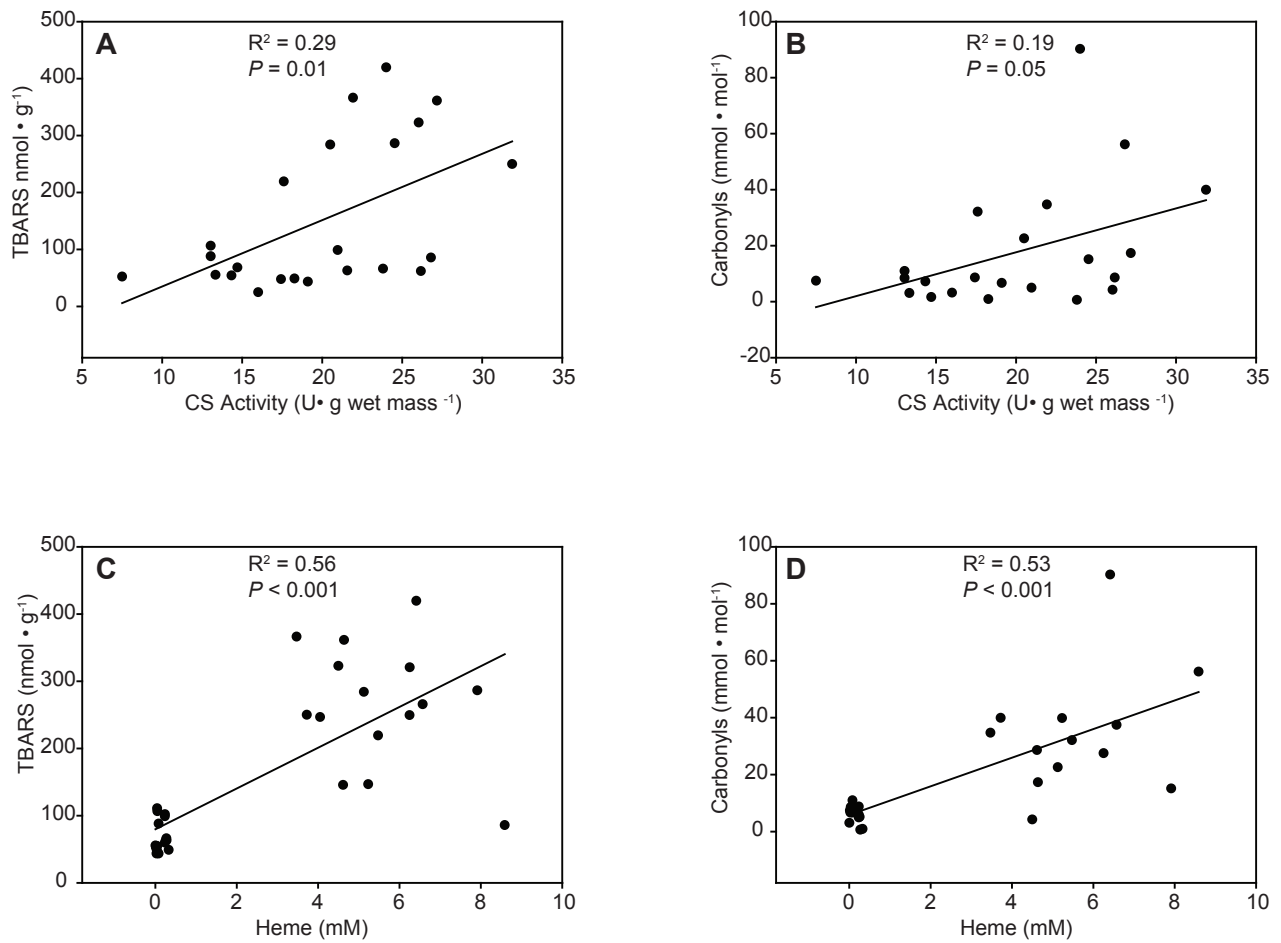

**Fig. S2.** Linear regression of pro-oxidants and levels of oxidized lipids (TBARS; 2A,C) and proteins (carbonyls; 2B,D) in oxidative pectoral adductor of 5 species of notothenioids.  $n=23-32$ .

### LIVER

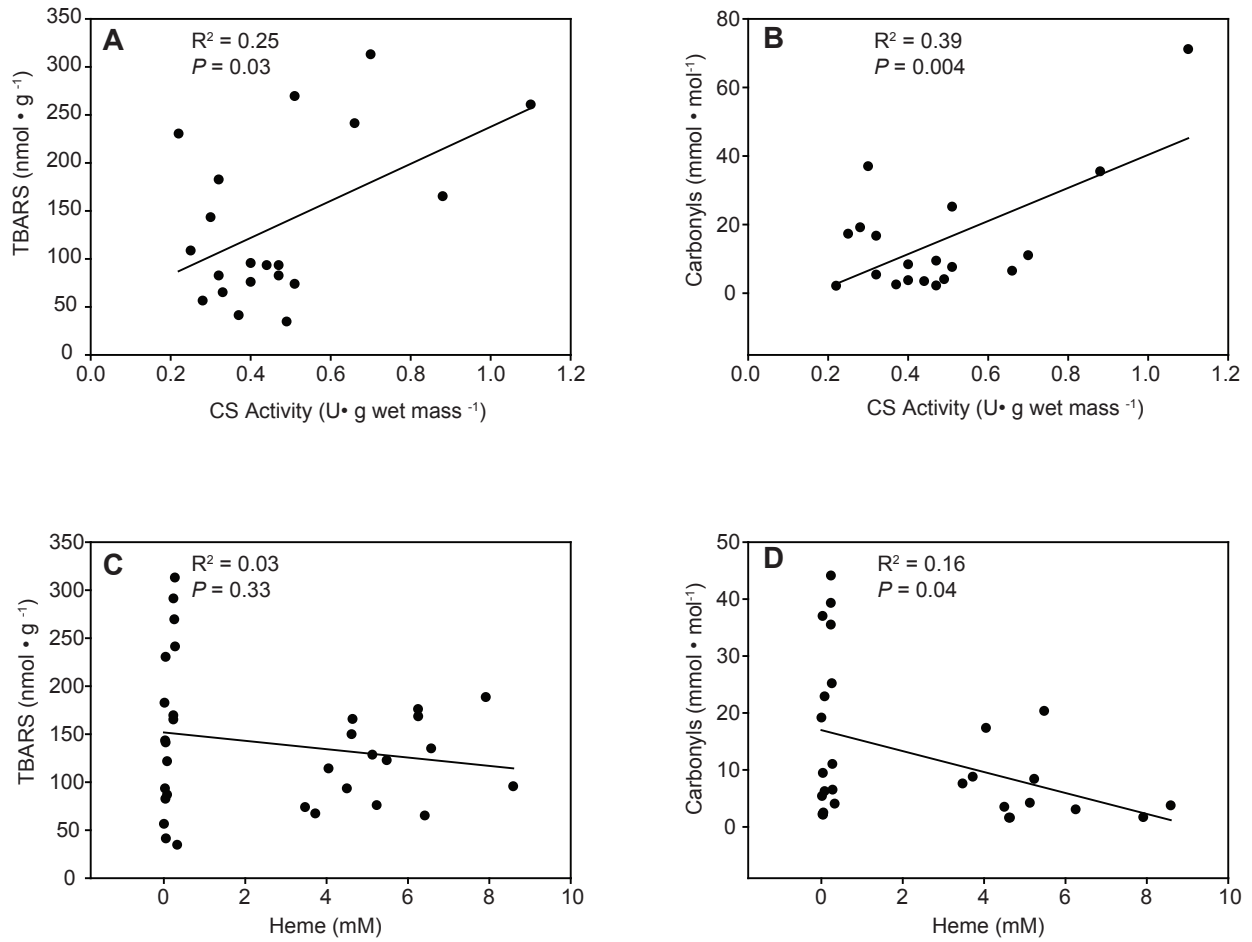

**Fig. S3.** Linear regression of pro-oxidants and levels of oxidized lipids (TBARS; 3A,C) and proteins (carbonyls; 3B,D) in livers of 5 species of notothenioids. n=20-31.

Table S1. Hierarchical clustering for heart ventricle

| Antioxidant                                                                             | V statistic* | Group Mean $\pm$ S.D. | Overall Mean $\pm$ S.D. | P value |
|-----------------------------------------------------------------------------------------|--------------|-----------------------|-------------------------|---------|
| <b>Group 1</b><br>( <i>C. gunnari</i> , <i>C. aceratus</i> , <i>C. rastrospinosus</i> ) |              |                       |                         |         |
| GSH                                                                                     | -3.60        | 177.25 $\pm$ 51.97    | 218.99 $\pm$ 82.69      | < 0.001 |
| CAT                                                                                     | -3.76        | 220.17 $\pm$ 67.90    | 284.13 $\pm$ 121.35     | < 0.001 |
| Ferritin                                                                                | -4.04        | 14.48 $\pm$ 10.90     | 46.37 $\pm$ 56.34       | < 0.001 |
| GR                                                                                      | -4.20        | 231.14 $\pm$ 57.76    | 293.61 $\pm$ 106.16     | < 0.001 |
| SOD                                                                                     | -4.45        | 1777.36 $\pm$ 287.82  | 2055.84 $\pm$ 446.23    | < 0.001 |
| TAP                                                                                     | -4.64        | 6.40 $\pm$ 0.72       | 7.11 $\pm$ 1.09         | < 0.001 |
| <b>Group 2 (<i>G. gibberifrons</i>)</b>                                                 |              |                       |                         |         |
| GR                                                                                      | 4.84         | 435.09 $\pm$ 67.98    | 293.61 $\pm$ 106.16     | <0.001  |
| Ferritin                                                                                | 4.61         | 117.87 $\pm$ 64.56    | 46.37 $\pm$ 56.34       | <0.001  |
| SOD                                                                                     | 3.64         | 2502.90 $\pm$ 371.13  | 2055.84 $\pm$ 446.23    | <0.001  |
| TAP                                                                                     | 2.33         | 7.81 $\pm$ 0.51       | 7.11 $\pm$ 1.09         | 0.020   |
| <b>Group 3 (<i>N. coriiceps</i>)</b>                                                    |              |                       |                         |         |
| CAT                                                                                     | 4.63         | 497.48 $\pm$ 94.06    | 284.13 $\pm$ 121.35     | < 0.001 |
| GSH                                                                                     | 4.24         | 352.12 $\pm$ 91.78    | 218.99 $\pm$ 82.69      | < 0.001 |
| TAP                                                                                     | 3.47         | 8.54 $\pm$ 0.70       | 7.11 $\pm$ 1.09         | < 0.001 |

Overall significance of species for group belonging:  $X^2$  (8, n=38),  $P < 0.001$

\* The standardized difference between the group and overall means, which follows a standard normal distribution under  $H_0$ . Ferritin levels from Kuhn et al., 2016).

Table S2. Hierarchical clustering for pectoral adductor

| Antioxidant                                                        | V statistic* | Group Mean $\pm$ S.D. | Overall Mean $\pm$ S.D. | P value |
|--------------------------------------------------------------------|--------------|-----------------------|-------------------------|---------|
| <b>Group 1</b><br>( <i>C. aceratus</i> , <i>C. rastropinosus</i> ) |              |                       |                         |         |
| CAT                                                                | -2.67        | 203.86 $\pm$ 100.10   | 261.09 $\pm$ 105.27     | 0.010   |
| GPX1                                                               | -2.69        | 0.48 $\pm$ 0.23       | 0.61 $\pm$ 0.25         | 0.010   |
| GR                                                                 | -2.93        | 128.47 $\pm$ 32.1     | 170.33 $\pm$ 70.22      | <0.001  |
| Ferritin                                                           | -3.45        | 6.69 $\pm$ 5.98       | 24.42 $\pm$ 25.27       | <0.001  |
| GST                                                                | -3.51        | 0.94 $\pm$ 0.35       | 1.32 $\pm$ 0.53         | <0.001  |
| SOD                                                                | -4.09        | 1614.47 $\pm$ 428.28  | 2036.74 $\pm$ 506.55    | <0.001  |
| GPX4                                                               | -5.11        | 12.39 $\pm$ 3.18      | 20.26 $\pm$ 7.57        | <0.001  |
| <b>Group 2</b><br>( <i>C. gunnari</i> )                            |              |                       |                         |         |
| SOD                                                                | 3.50         | 2493.27 $\pm$ 256.72  | 2036.74 $\pm$ 506.55    | <0.001  |
| GPX1                                                               | 2.40         | 0.77 $\pm$ 0.19       | 0.61 $\pm$ 0.25         | 0.020   |
| TAP                                                                | -2.33        | 4.37 $\pm$ 0.76       | 5.08 $\pm$ 1.19         | 0.020   |
| <b>Group 3</b><br>( <i>N. coriiceps</i> )                          |              |                       |                         |         |
| GR                                                                 | 5.20         | 286.48 $\pm$ 45.37    | 170.33 $\pm$ 70.22      | <0.001  |
| CAT                                                                | 4.42         | 409.24 $\pm$ 52.66    | 261.09 $\pm$ 105.27     | <0.001  |
| GPX4                                                               | 2.99         | 27.45 $\pm$ 3.09      | 20.26 $\pm$ 7.57        | <0.001  |
| Ferritin                                                           | 2.06         | 41.02 $\pm$ 24.11     | 24.42 $\pm$ 25.27       | 0.040   |
| <b>Group 4</b><br>( <i>G. gibberifrons</i> )                       |              |                       |                         |         |
| Ferritin                                                           | 4.09         | 73.94 $\pm$ 15.43     | 24.42 $\pm$ 25.27       | <0.001  |
| GST                                                                | 3.30         | 2.16 $\pm$ 0.36       | 1.32 $\pm$ 0.53         | <0.001  |
| TAP                                                                | 2.65         | 6.60 $\pm$ 0.48       | 5.08 $\pm$ 1.19         | 0.010   |
| GPX4                                                               | 2.17         | 28.14 $\pm$ 3.84      | 20.26 $\pm$ 7.57        | 0.030   |
| GSH                                                                | 2.08         | 197.72 $\pm$ 20.59    | 161.47 $\pm$ 36.37      | 0.040   |

Overall significance of species for group belonging:  $\chi^2$  (12, n=38),  $P < 0.001$

\* The standardized difference between the group and overall means, which follows a standard normal distribution under  $H_0$ .

Table S3. Hierarchical clustering for liver

| Antioxidant                                                         | V statistic* | Group Mean $\pm$ S.D. | Overall Mean $\pm$ S.D. | P value |
|---------------------------------------------------------------------|--------------|-----------------------|-------------------------|---------|
| <b>Group 1</b><br>( <i>C. aceratus</i> , <i>C. rastrospinosus</i> ) |              |                       |                         |         |
| TAP                                                                 | -2.66        | 4.42 $\pm$ 2.22       | 5.85 $\pm$ 2.37         | 0.010   |
| Ferritin                                                            | -3.35        | 9.73 $\pm$ 6.03       | 39.94 $\pm$ 39.51       | <0.001  |
| GST                                                                 | -3.43        | 12.60 $\pm$ 5.37      | 18.91 $\pm$ 8.05        | <0.001  |
| SOD                                                                 | -4.71        | 5030.46 $\pm$ 1058.52 | 7192.55 $\pm$ 2013.93   | <0.001  |
| CAT                                                                 | -4.86        | 1631.33 $\pm$ 604.50  | 3703.37 $\pm$ 1871.42   | <0.001  |
| <b>Group 2</b><br>( <i>C. gunnari</i> )                             |              |                       |                         |         |
| SOD                                                                 | 3.67         | 9542.63 $\pm$ 894.76  | 7192.55 $\pm$ 2013.93   | < 0.001 |
| GR                                                                  | -3.72        | 116.66 $\pm$ 49.66    | 256.15 $\pm$ 117.76     | < 0.001 |
| <b>Group 3</b><br>( <i>N. coriiceps</i> )                           |              |                       |                         |         |
| TAP                                                                 | 2.60         | 7.54 $\pm$ 1.47       | 5.85 $\pm$ 2.37         | 0.010   |
| CAT                                                                 | 2.53         | 5007.53 $\pm$ 1415.39 | 3703.37 $\pm$ 1871.42   | 0.010   |
| <b>Group 4</b><br>( <i>G. gibberifrons</i> )                        |              |                       |                         |         |
| GSH                                                                 | 4.50         | 281.40 $\pm$ 58.54    | 170.33 $\pm$ 71.34      | <0.001  |
| GST                                                                 | 3.99         | 30.02 $\pm$ 4.34      | 18.91 $\pm$ 8.05        | <0.001  |
| GR                                                                  | 3.48         | 398.07 $\pm$ 89.17    | 256.15 $\pm$ 117.76     | <0.001  |
| Ferritin                                                            | 3.19         | 83.49 $\pm$ 39.91     | 39.94 $\pm$ 39.51       | <0.001  |
| CAT                                                                 | 2.85         | 5547.79 $\pm$ 780.98  | 3703.37 $\pm$ 1871.42   | <0.001  |
| SOD                                                                 | 2.14         | 8684.14 $\pm$ 468.28  | 7192.55 $\pm$ 2013.93   | 0.030   |

Overall significance of species for group belonging:  $X^2$  (12, n=38),  $P < 0.001$

\* The standardized difference between the group and overall means, which follows a standard normal distribution under  $H_0$ .
